# Supplementary material
Source: bioRxiv or medRxiv preprint supplement (https://medrxiv.org/highwire/filestream/93150/field_highwire_adjunct_files/2/2020.08.12.20166579-3.pdf)
Supplement: Supplementary file [file 2020.08.12.20166579-3.pdf]

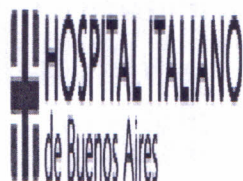

**Hospital Italiano**  
**COMITÉ DE ÉTICA EN INVESTIGACIÓN**

Buenos Aires, 16 de Abril de 2020

De acuerdo con lo establecido en la normativa vigente, este Comité ha evaluado el proyecto de investigación que a continuación se menciona.

**Código de registro:** 1209

**Título del protocolo:** Desarrollo de plataforma virtual y modelo de alerta temprana para pacientes con COVID 19

**Patrocinador:** no corresponde

**Investigador principal:** Ivan Huespe

**Institución donde se desarrollará:** Hospital Italiano de Buenos Aires (por subrogación)

Con relación al mismo se ha recibido la siguiente documentación:

- Autorización de la Dirección de la Institución con caracter previo al dictamen
- Autorización de jefe superior
- Protocolo Fecha: 31 / 03 / 2020 Versión: version 1
- Consentimientos / asentimientos Detalle: no corresponde
- Material que se entrega a los sujetos, avisos de reclutamiento y otros documentos Detalle: no corresponde
- Declaración jurada conforme modelo del Anexo III, Resolución 2476/MSGC/2019
- CV del investigador principal

**Categorización de riesgo asignado por el CEI:** Riesgo mínimo

Los miembros del Comité han discutido convenientemente el proyecto, particularmente los aspectos referidos al mantenimiento de la confidencialidad de los datos y la manera de tratamiento y almacenamiento de los mismos. Se ha considerado además el beneficio de desarrollar herramientas para categorización del riesgo de los pacientes con enfermedad respiratoria por covid-19 en el contexto actual, y la consecuente optimización de los recursos del sistema de salud.

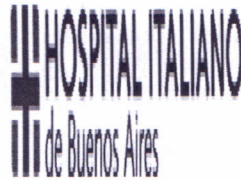

**Hospital Italiano  
COMITÉ DE ÉTICA EN INVESTIGACIÓN**

De igual forma, han procedido a evaluar la documentación que respalda la idoneidad del investigador principal, incluyendo título profesional, matrícula profesional, curriculum vitae, certificación de especialista y capacitación en buenas prácticas clínicas. También se ha considerado la adecuación de las instalaciones para el desarrollo del estudio en evaluación.

Luego de considerar todo lo antes mencionado, el Comité de Ética en Investigación del Hospital Italiano ha decidido aprobar el protocolo de referencia para su realización en Hospital Italiano de Buenos Aires, dirigido por Huespe, Ivan como investigador principal. El presente dictamen tiene una vigencia de un (1) año.

Con relación a esta aprobación, se deja constancia que se han aprobado específicamente los documentos que se mencionan a continuación:

- Protocolo, fecha: 31 / 03 / 2020, versión: version 1
- Consentimientos/asentimientos: no corresponde
- Material que se entrega a los sujetos, avisos de reclutamiento y otros documentos: no corresponde

La investigación de referencia no será supervisada de manera continua por este Comité de acuerdo con lo contemplado en sus Procedimiento Operativos Estandarizados.

Firmas por el CEI

**REUNION ZOOM 2634406689**

|                     |                                     |
|---------------------|-------------------------------------|
| ANIBAL ARIAS        | MIEMBRO PRESENTE EN REUNION VIRTUAL |
| JORGE BORETTO       | MIEMBRO PRESENTE EN REUNION VIRTUAL |
| CARLOS BURGER       | MIEMBRO PRESENTE EN REUNION VIRTUAL |
| PAOLA CASCIATO      | MIEMBRO PRESENTE EN REUNION VIRTUAL |
| OSCAR MAZZA         | MIEMBRO PRESENTE EN REUNION VIRTUAL |
| AUGUSTO PEREZ       | MIEMBRO PRESENTE EN REUNION VIRTUAL |
| LUCRECIA PIÑEIRO    | MIEMBRO PRESENTE EN REUNION VIRTUAL |
| MARIA ELENA SAHORES | MIEMBRO PRESENTE EN REUNION VIRTUAL |
| PAULA SCIBONA       | MIEMBRO PRESENTE EN REUNION VIRTUAL |
| DEBORA SZEINMAN     | MIEMBRO PRESENTE EN REUNION VIRTUAL |
| JULIETA TRINKS      | MIEMBRO PRESENTE EN REUNION VIRTUAL |

Dr. Augusto Pérez  
Coordinador

Página 2 de 3

La presente constancia ha sido emitida en la Plataforma de Registro Informatizado de Investigaciones en Salud de Buenos Aires (Hospital Italiano Bs. As.) el día 16 de Abril de 2020 a las 11:38 hs.

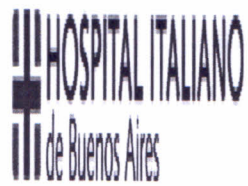

**Hospital Italiano  
COMITÉ DE ÉTICA EN INVESTIGACIÓN**
